# Supplementary material
Source: Springer Nature journal article supplement (https://www.springermedizin.de/resource/supplementary/12916_2011_541_MOESM1_ESM.pdf/9598116)

# Study Flow Diagram

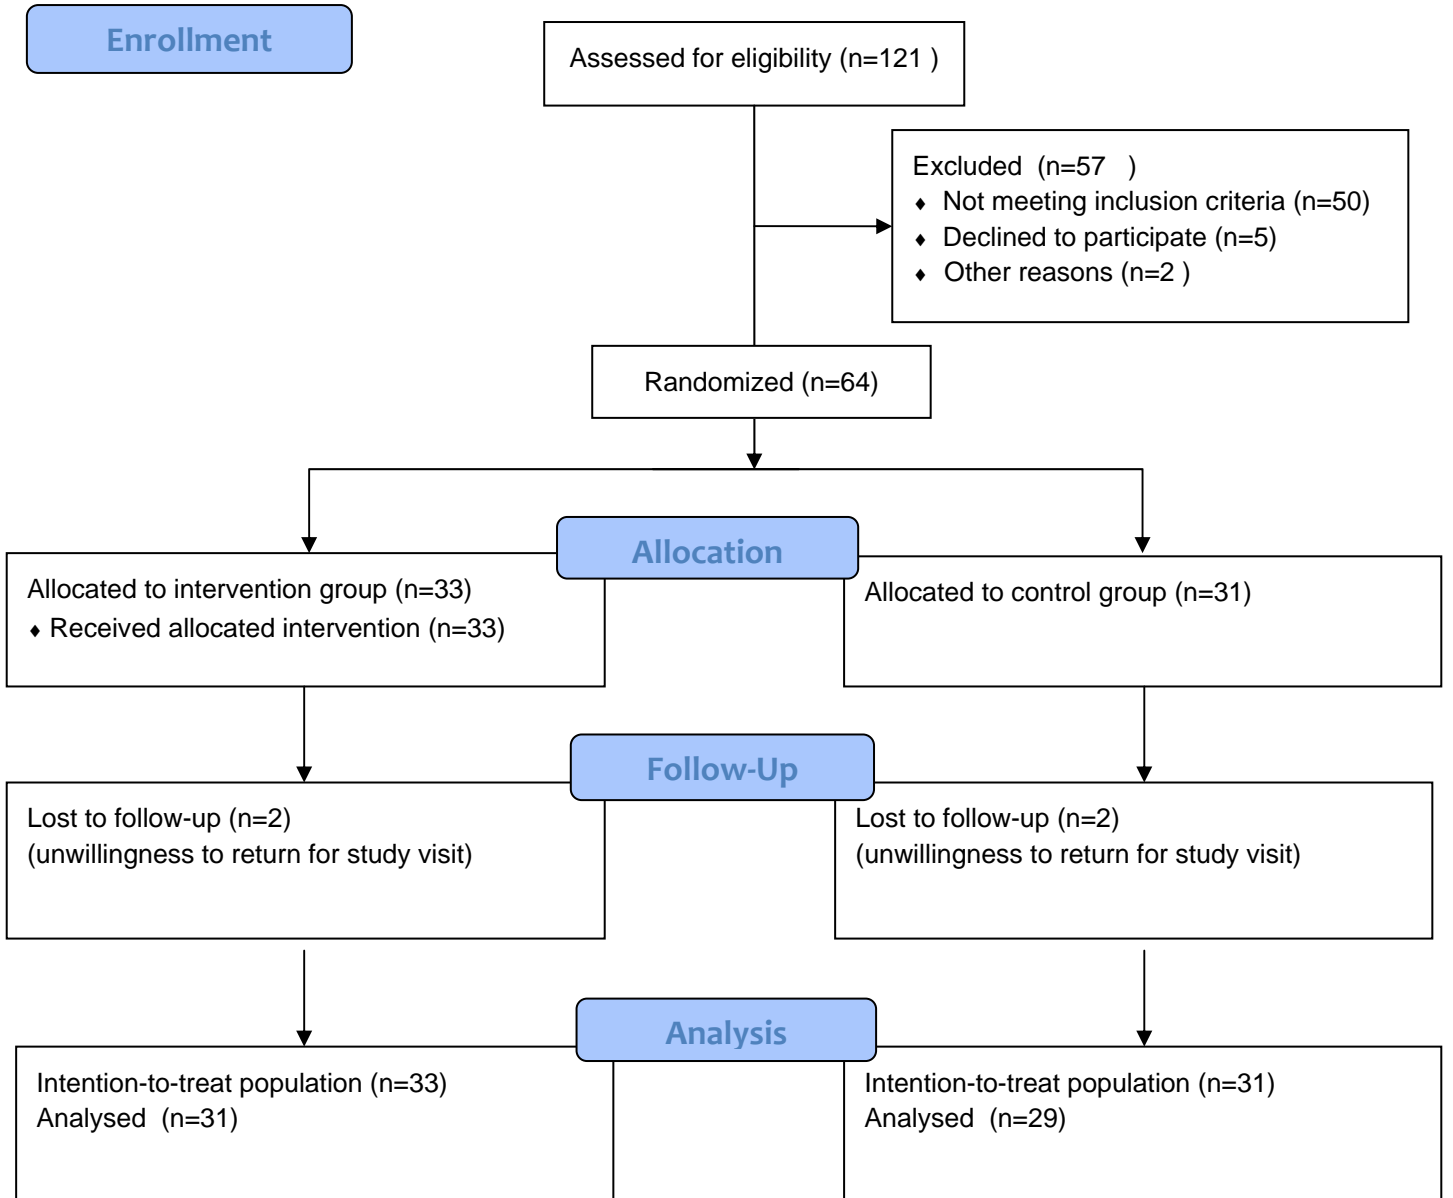

Supplement: MOESM1 [file 9598116]
